# Supplementary material for: Preparation of Ni(OH)2 nanoplatelet/electrospun carbon nanofiber hybrids for highly sensitive nonenzymatic glucose sensors
Source: Royal Society of Chemistry journal article supplement (doi:10.1039/c7ra02064c), 2017-01-01
Supplement: c7ra02064c1.pdf [file c7ra02064c1.pdf]

## Supplementary Information

### **Preparation of Ni(OH)<sub>2</sub> nanoplatelet/electrospun carbon nanofiber hybrids for highly sensitive non-enzymatic glucose sensors**

Linlin Chen, Lijuan Liu, Qiaohui Guo\*, Zhonghui Wang, Guiling Liu,

Shuiliang Chen, Haoqing Hou\*

Department of Chemistry and Chemical Engineering, Jiangxi Normal University,

Nanchang, Jiangxi 330022, China

**\*Corresponding Author:** Qiaohui Guo, Ph.D.

Tel: (+86) 791-8812-0389; Fax: (+86) 791-8812-0536

E-mail address: guoqiaohui@jxnu.edu.cn

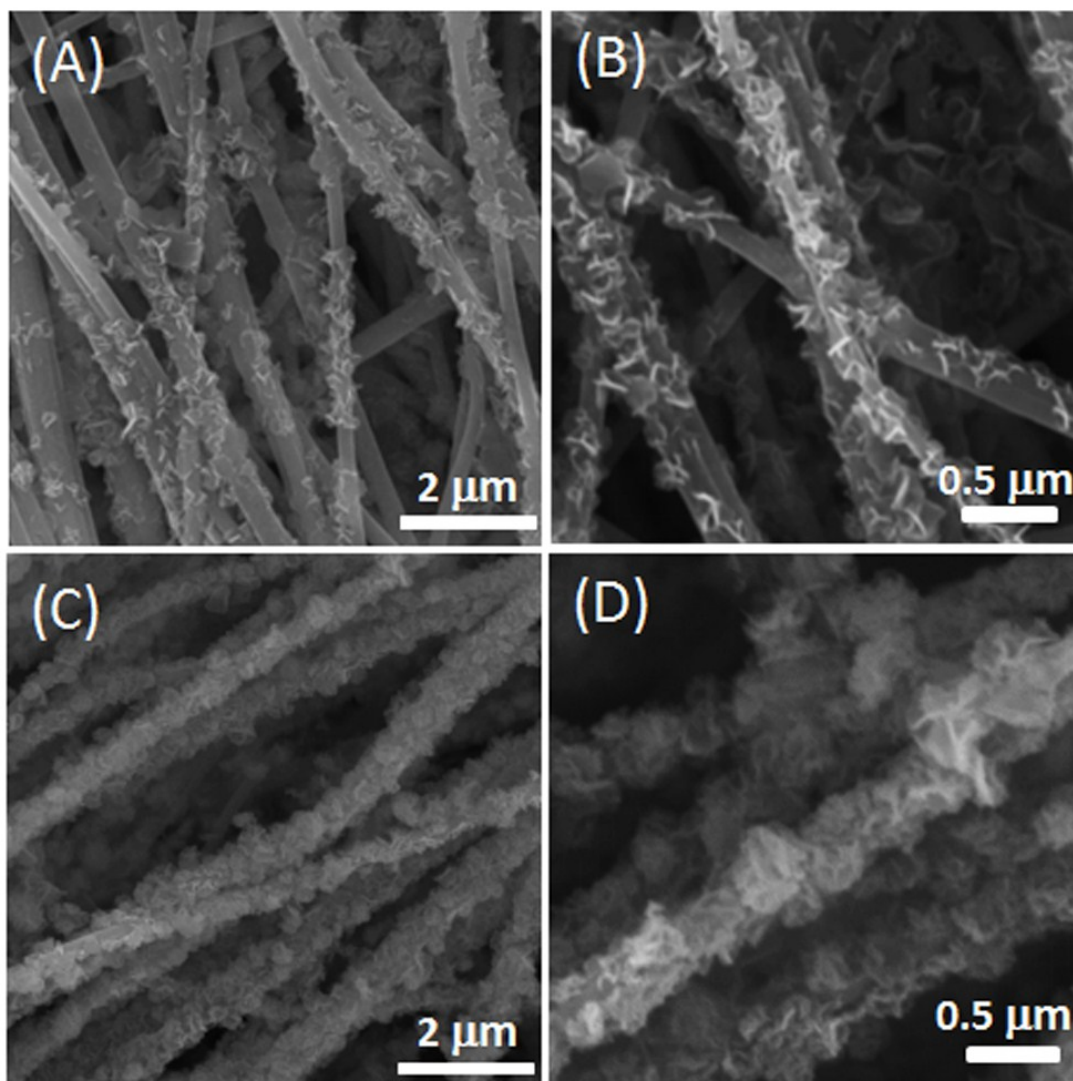

**Fig. S1** SEM images of Ni(OH)<sub>2</sub>/ECF-0.03 (A, B), and Ni(OH)<sub>2</sub>/ECF-0.12 (C, D), respectively.

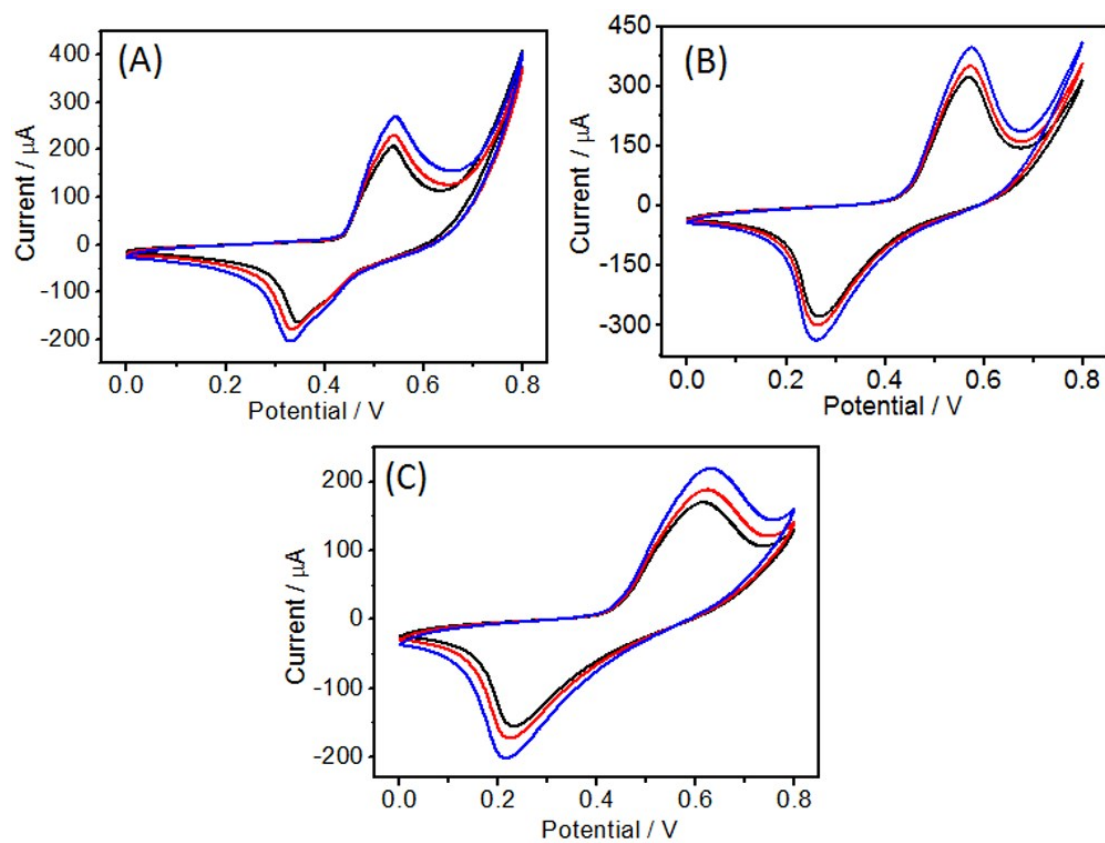

**Fig. S2** CV curves of  $\text{Ni}(\text{OH})_2/\text{ECF}-0.03$  (A),  $\text{Ni}(\text{OH})_2/\text{ECF}-0.12$  (B) and pure  $\text{Ni}(\text{OH})_2$  nanoplatforms modified electrodes (C) in 0.1 M NaOH solution containing 50  $\mu\text{M}$  (black line), 100  $\mu\text{M}$  (red line) and 200  $\mu\text{M}$  (blue line) glucose, scan rate 50  $\text{mV s}^{-1}$ .

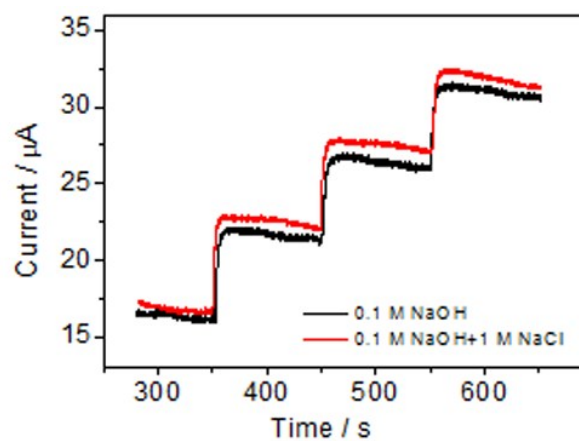

**Fig. S3** I-t responses of  $\text{Ni}(\text{OH})_2/\text{ECF-0.06}$  modified electrode with successive additions of 0.5 mM glucose to 0.1 M NaOH solution and 0.1 M NaOH solution containing 1 M NaCl.
